# Supplementary material for: Facioscapulohumeral dystrophy weakened sarcomeric contractility is mimicked in induced pluripotent stem cells‐derived innervated muscle fibres
Source: PubMed Central journal article supplement (PMC8818656; doi:10.1002/jcsm.12835), 2021-12-03

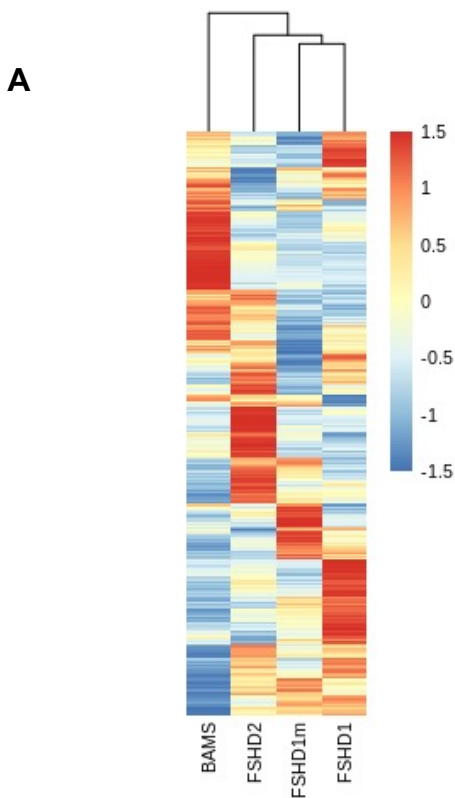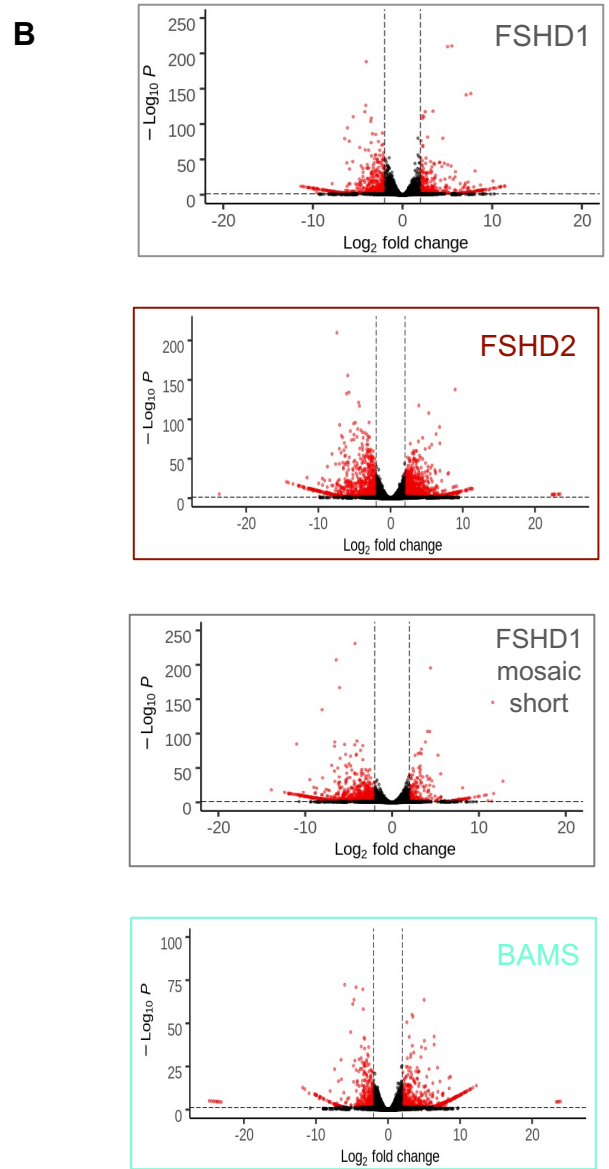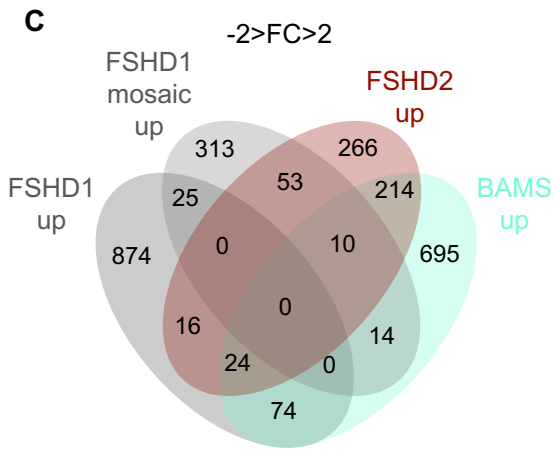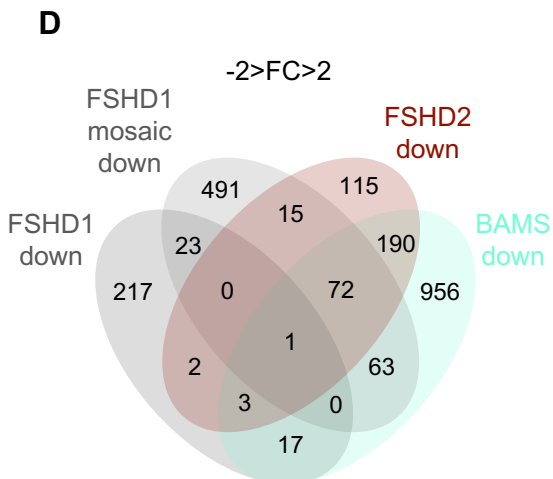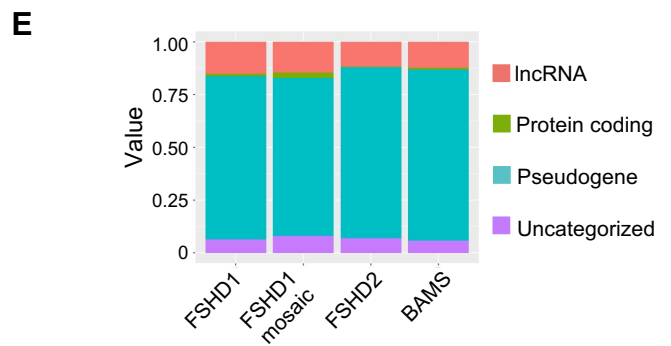

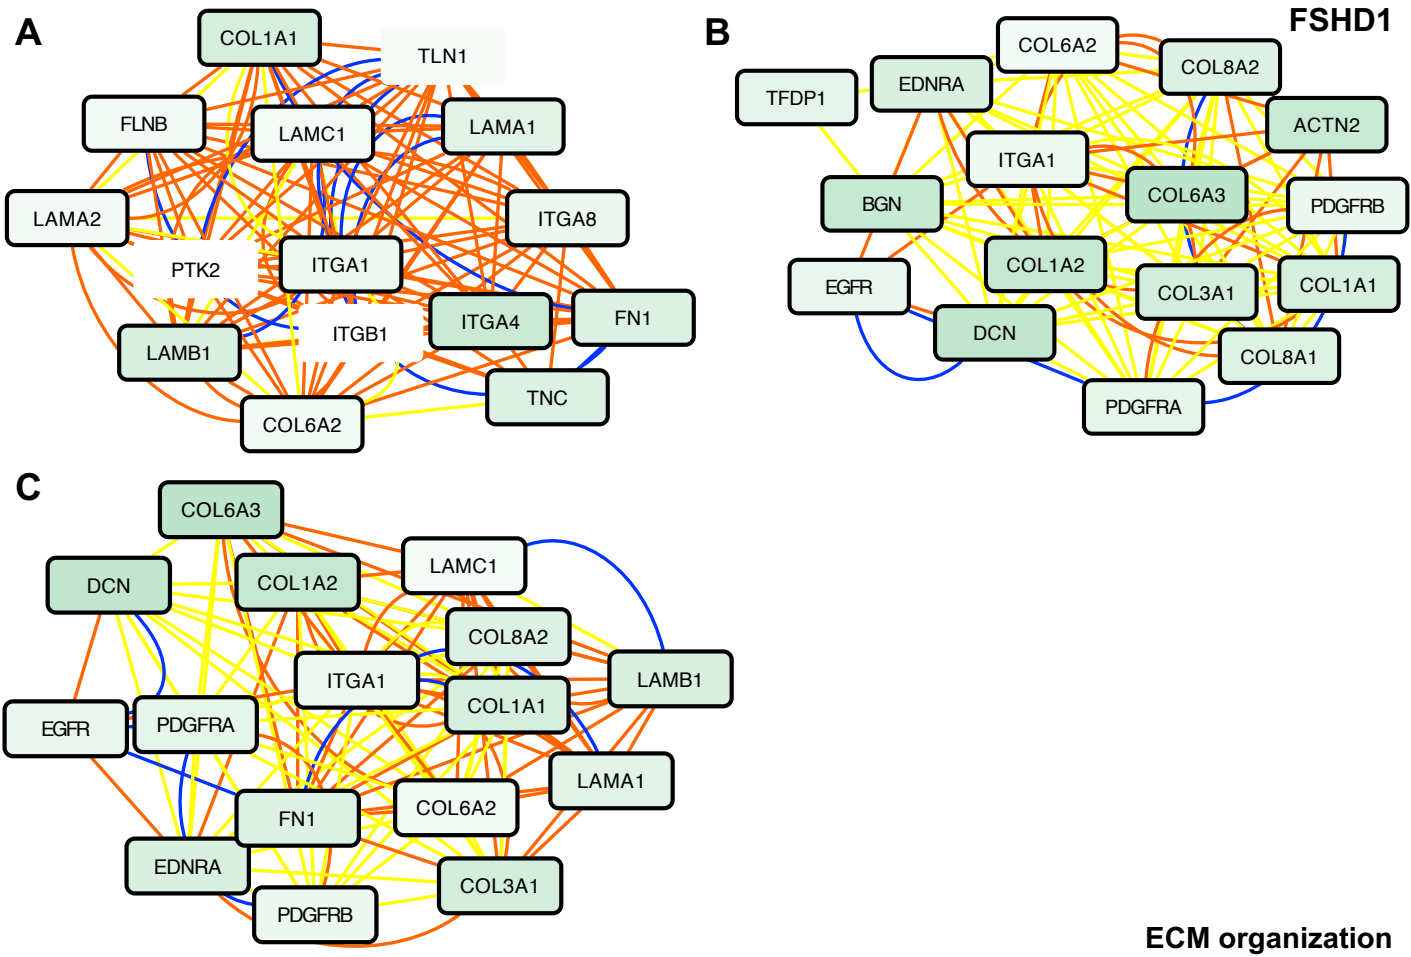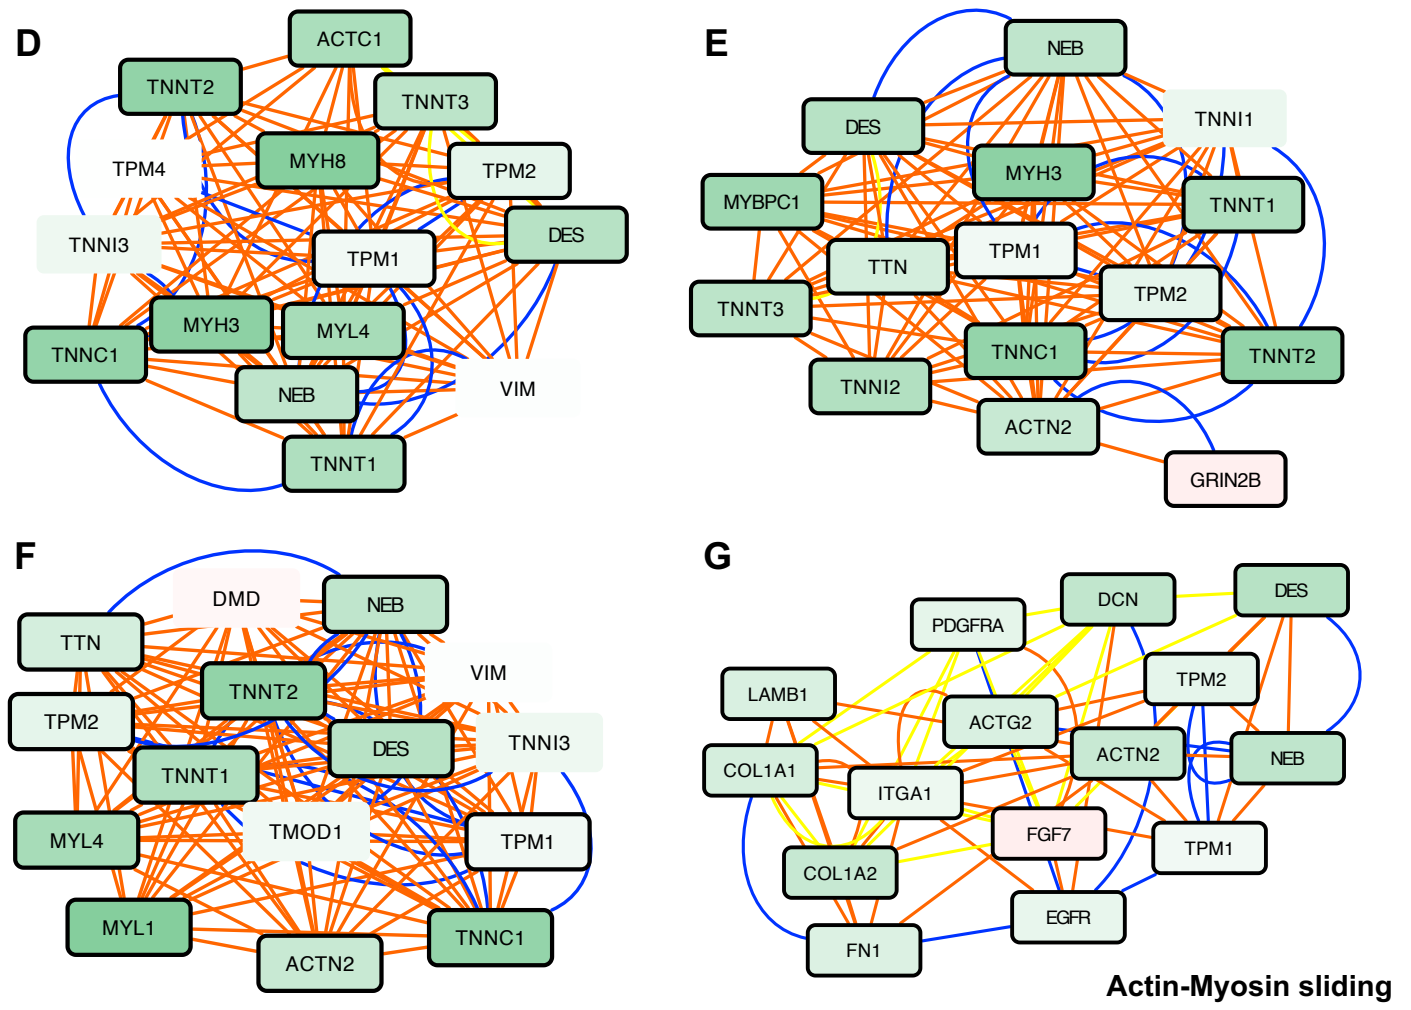

**FSHD1**  
**Tyrosine Kinase signalling**

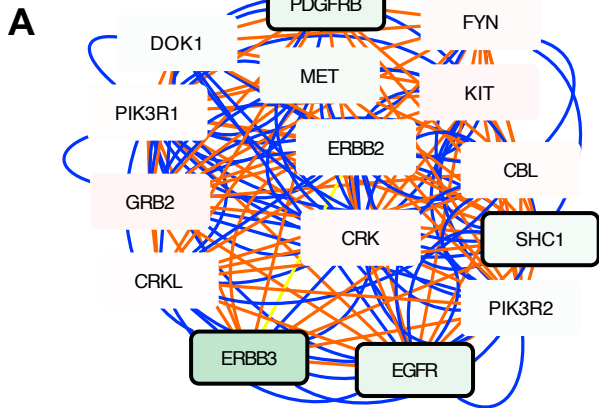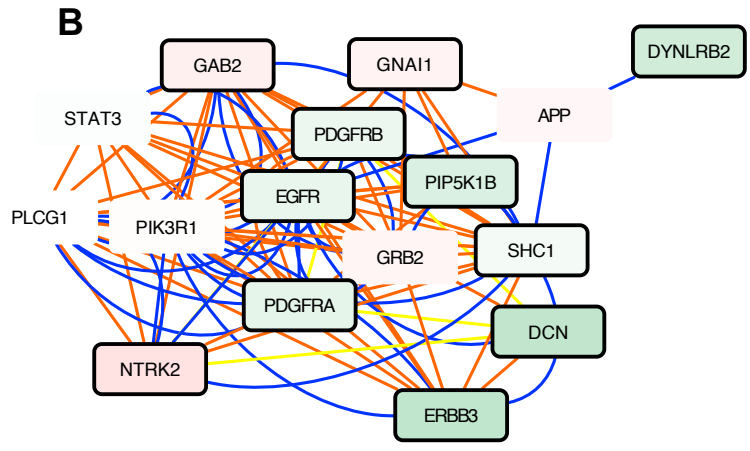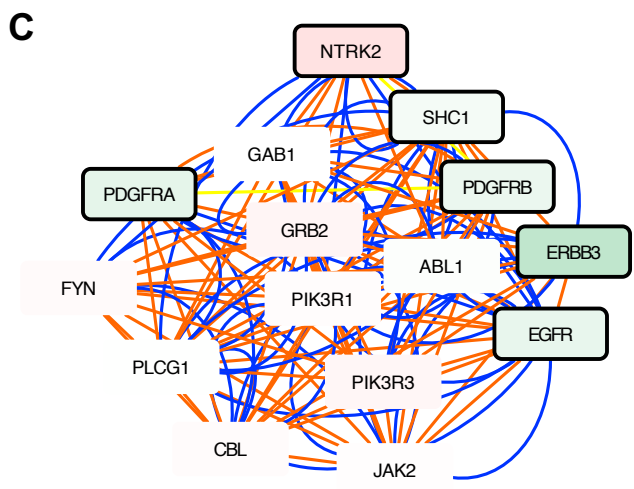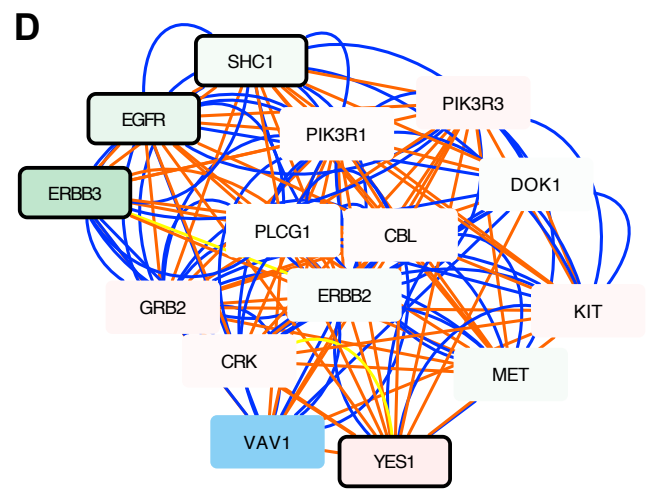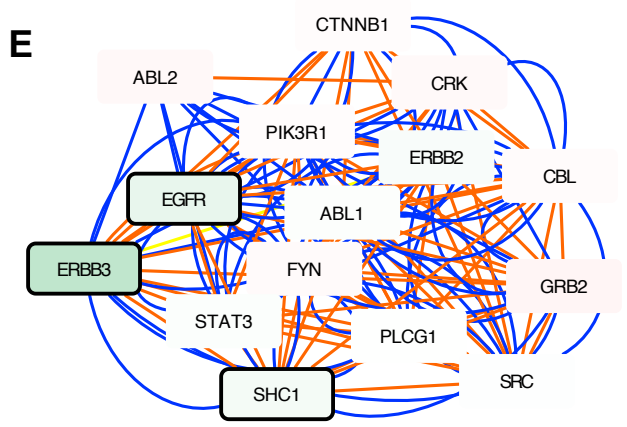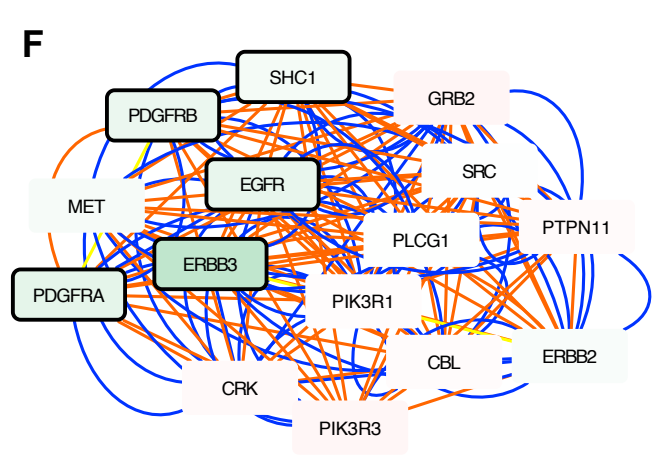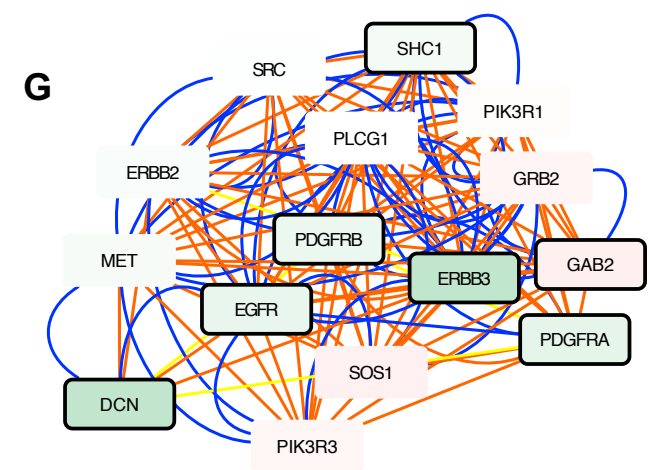

# FSHD1 Phosphatidylinositol signalling

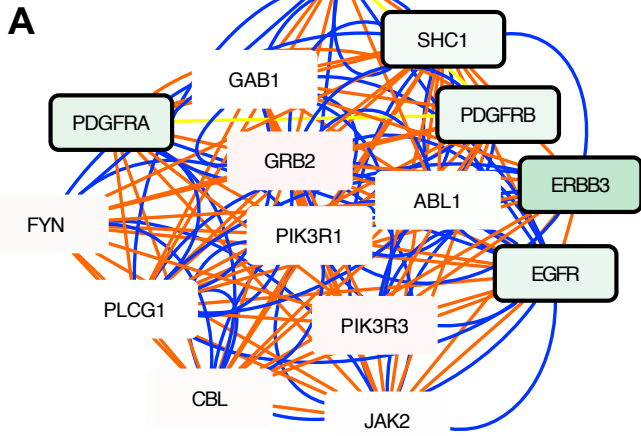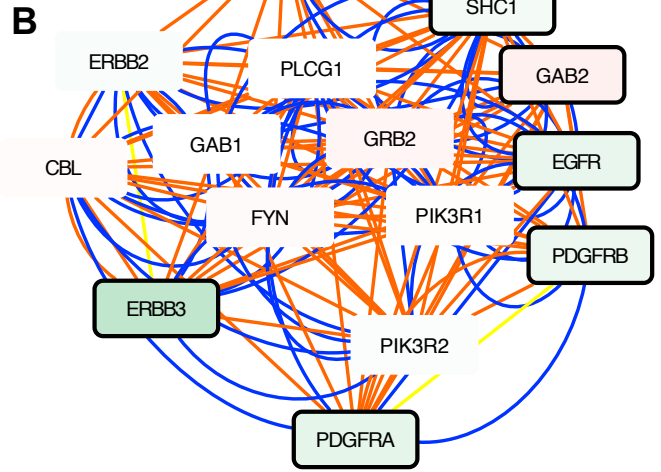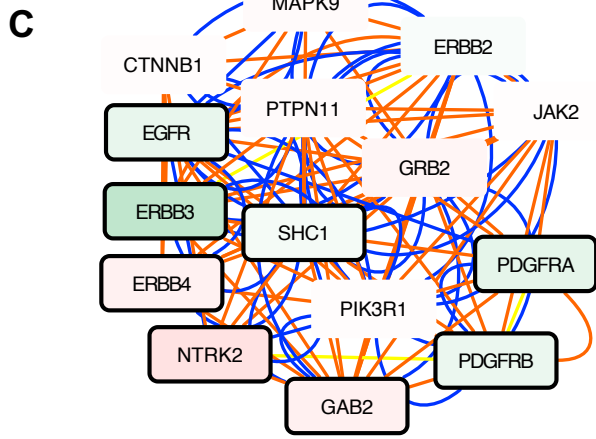

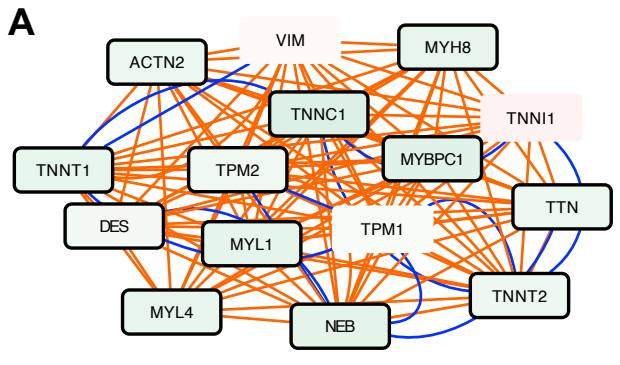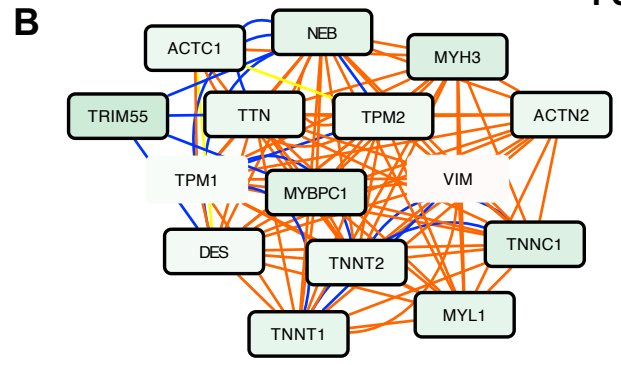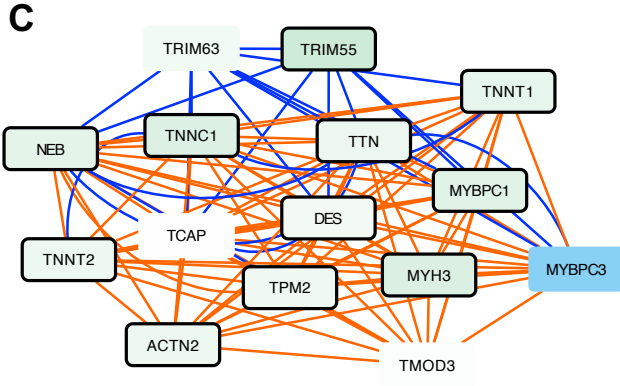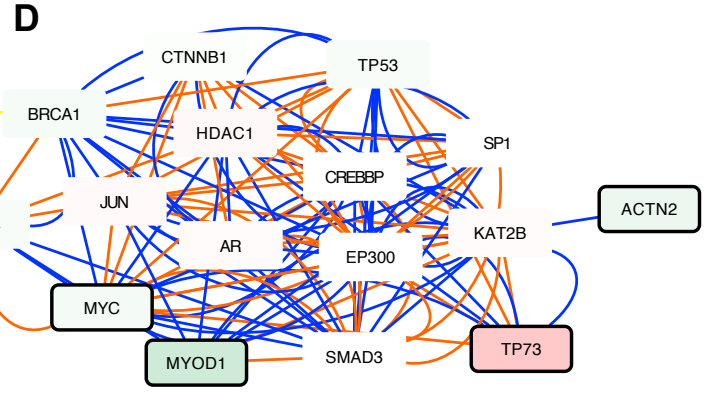

Actin-Myosin sliding

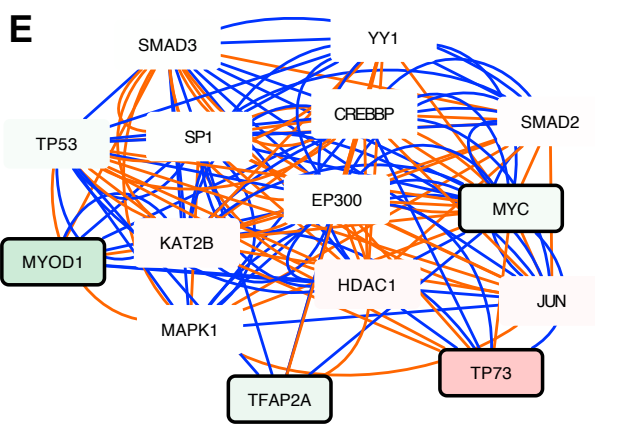

Macromolecule synthesis

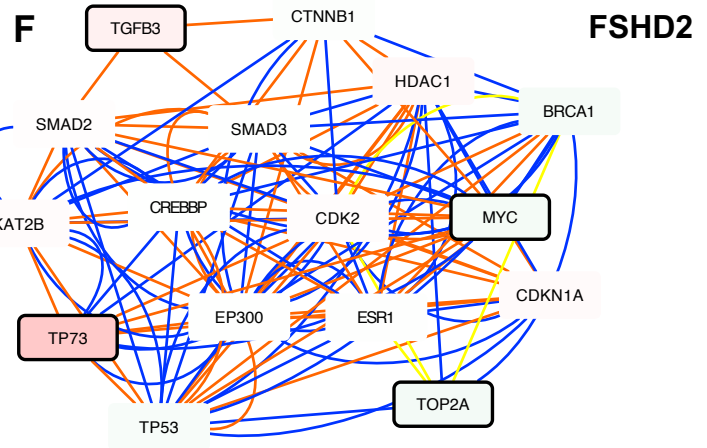

Regulation of transcription

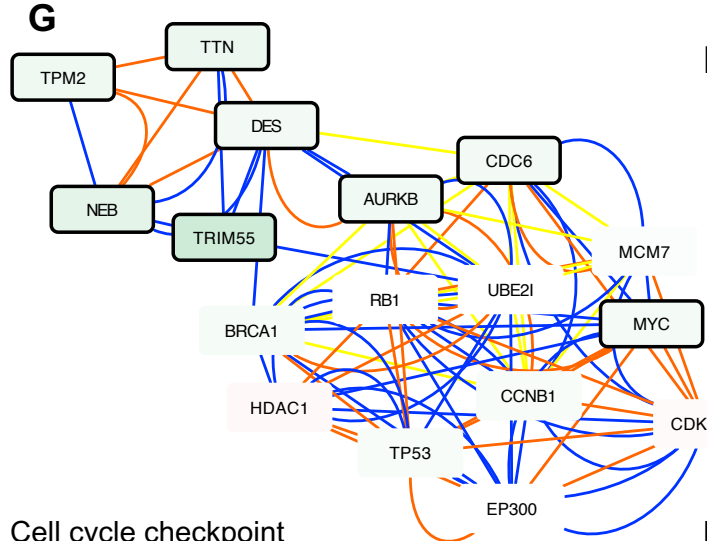

Cell cycle checkpoint

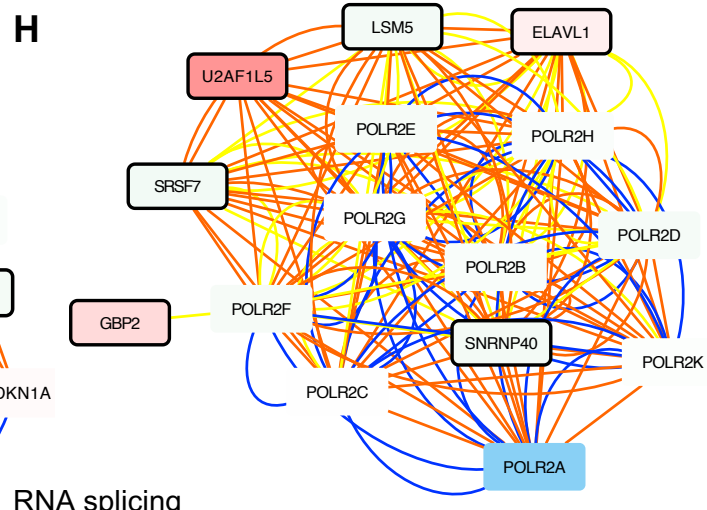

RNA splicing

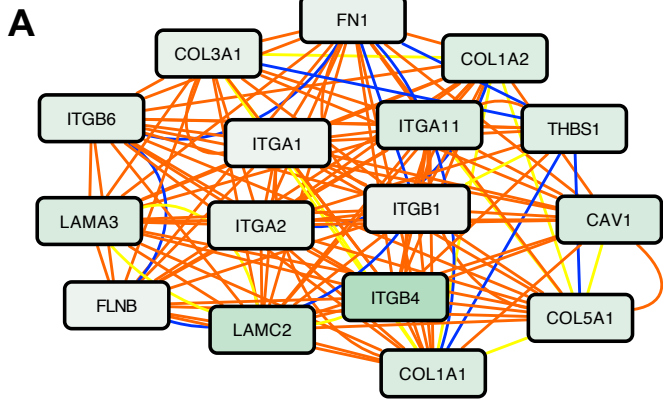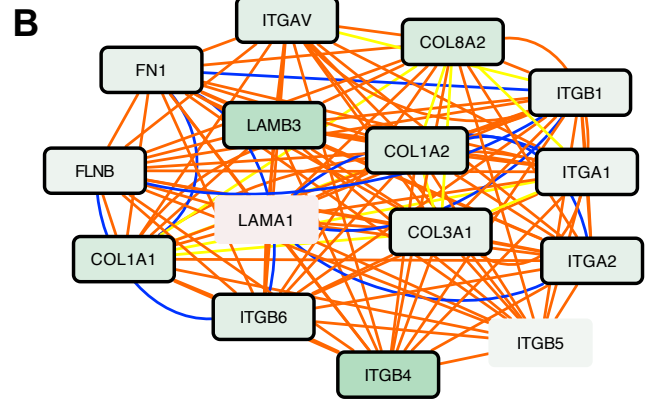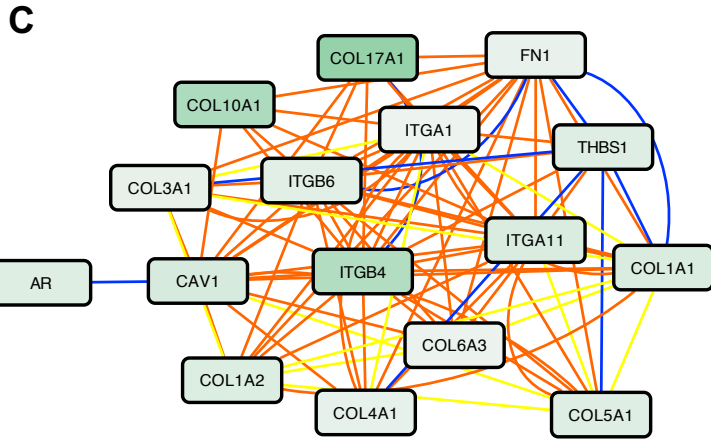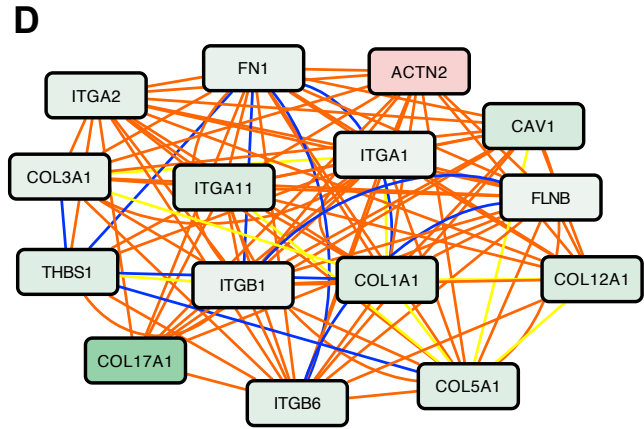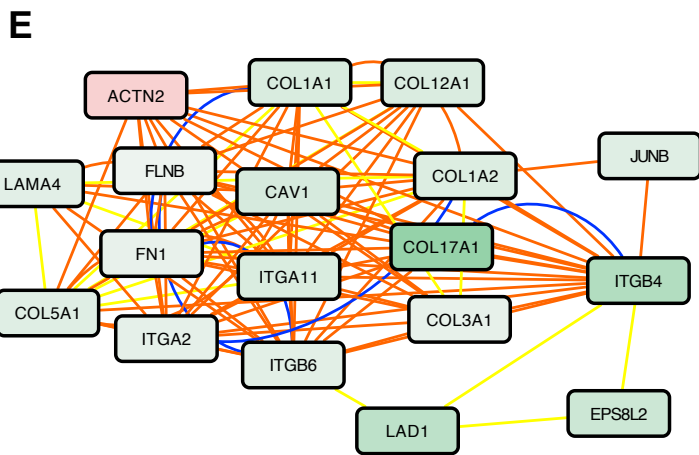

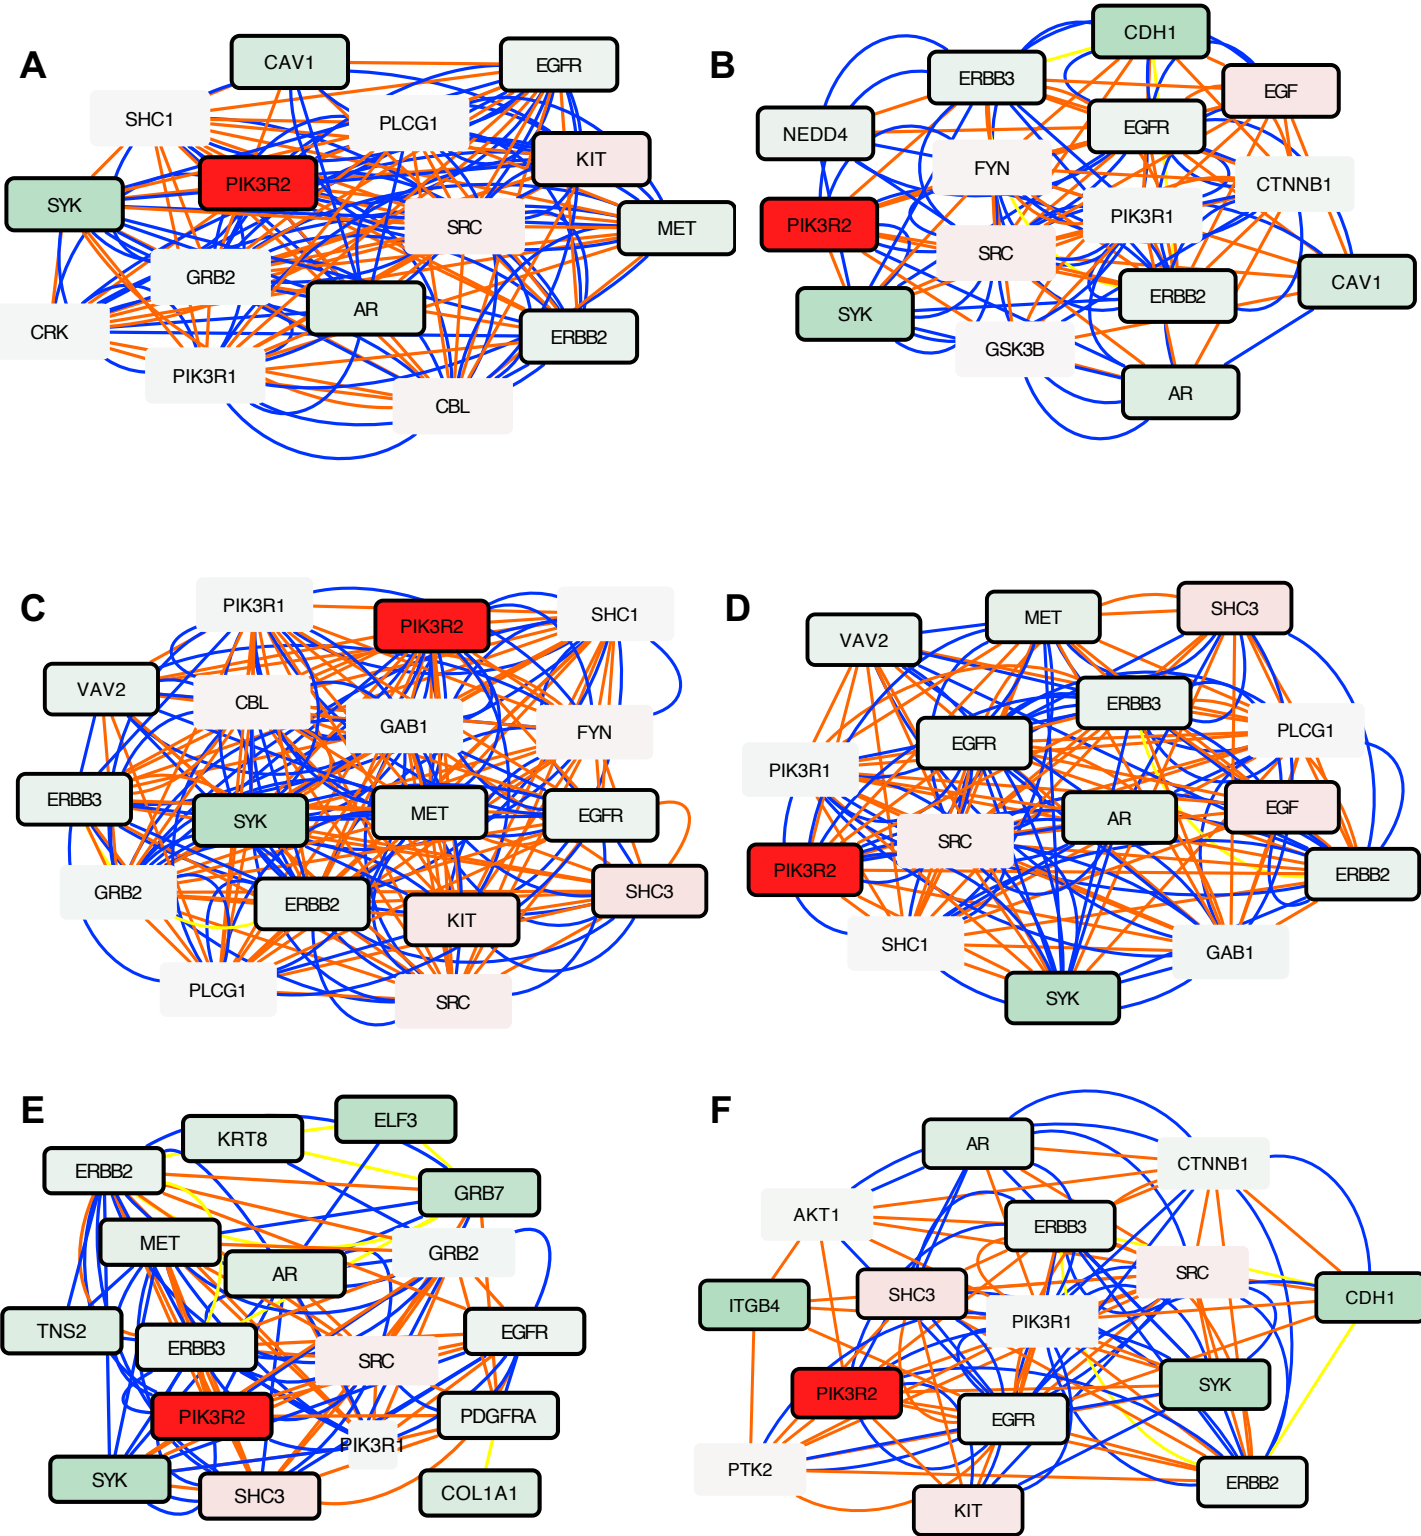

**A**

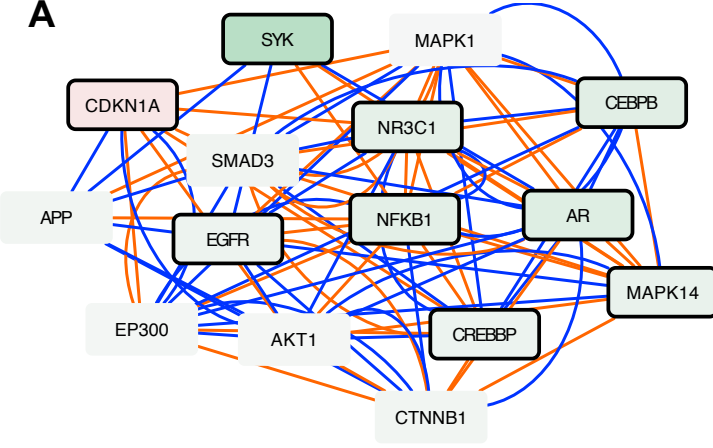

Apoptotic process

**B**

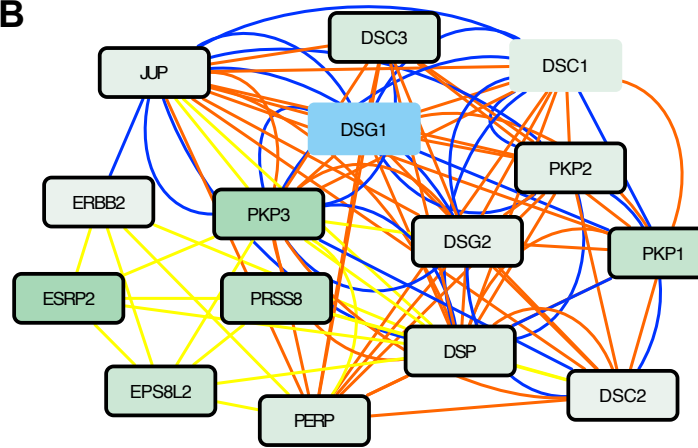

Cornification

**C**

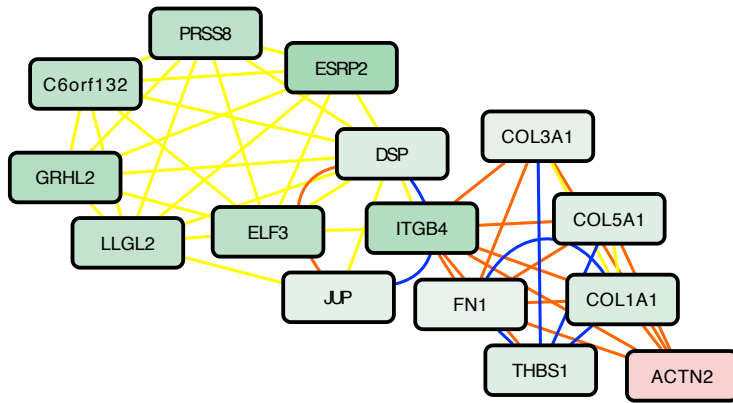

Skin development



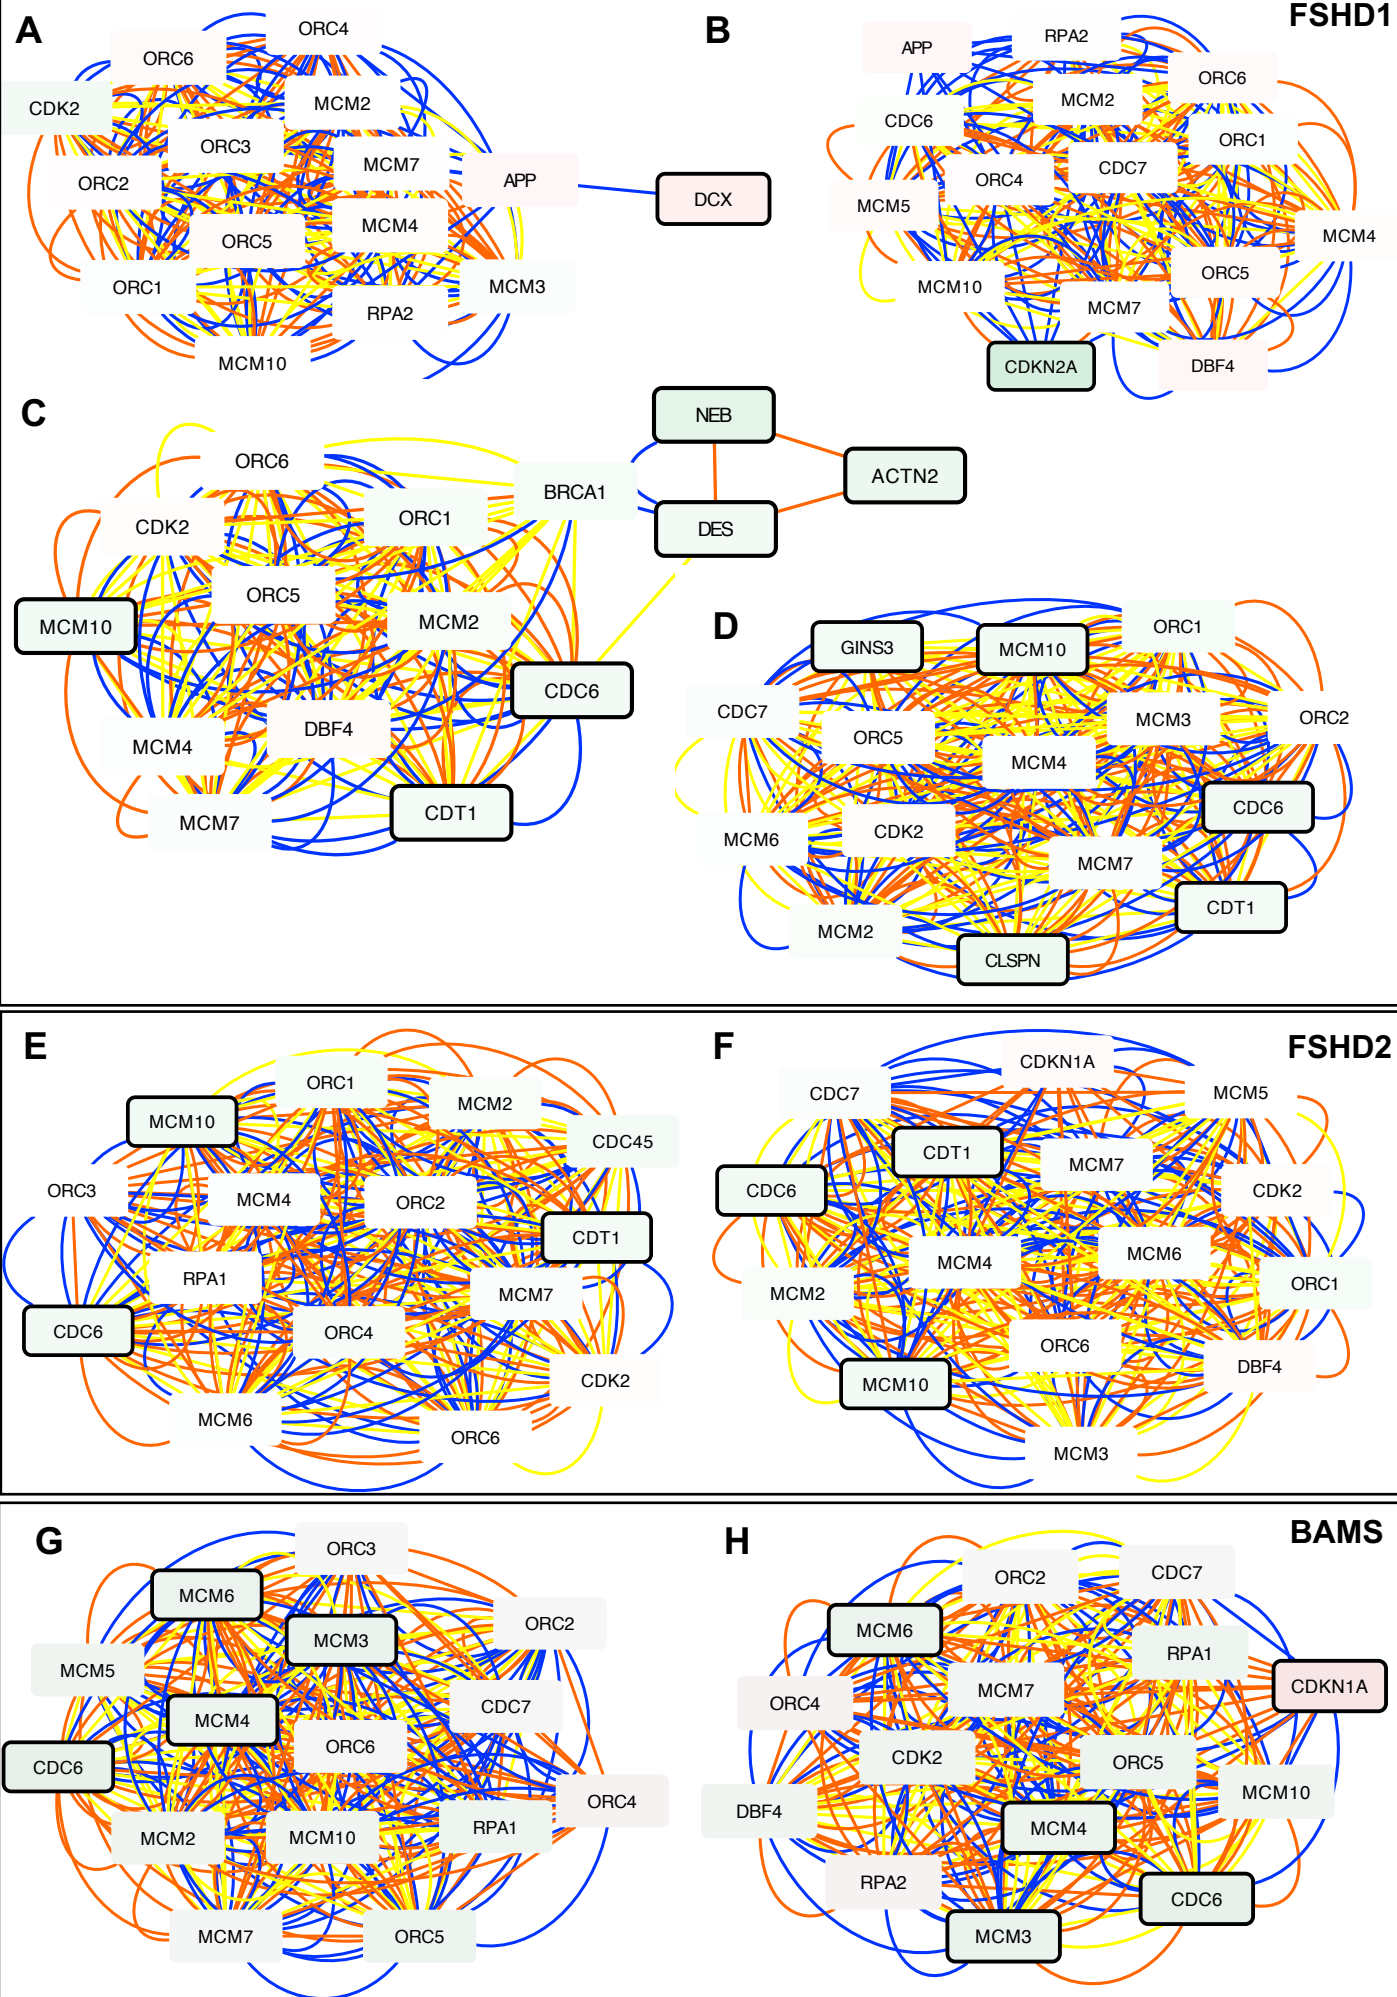

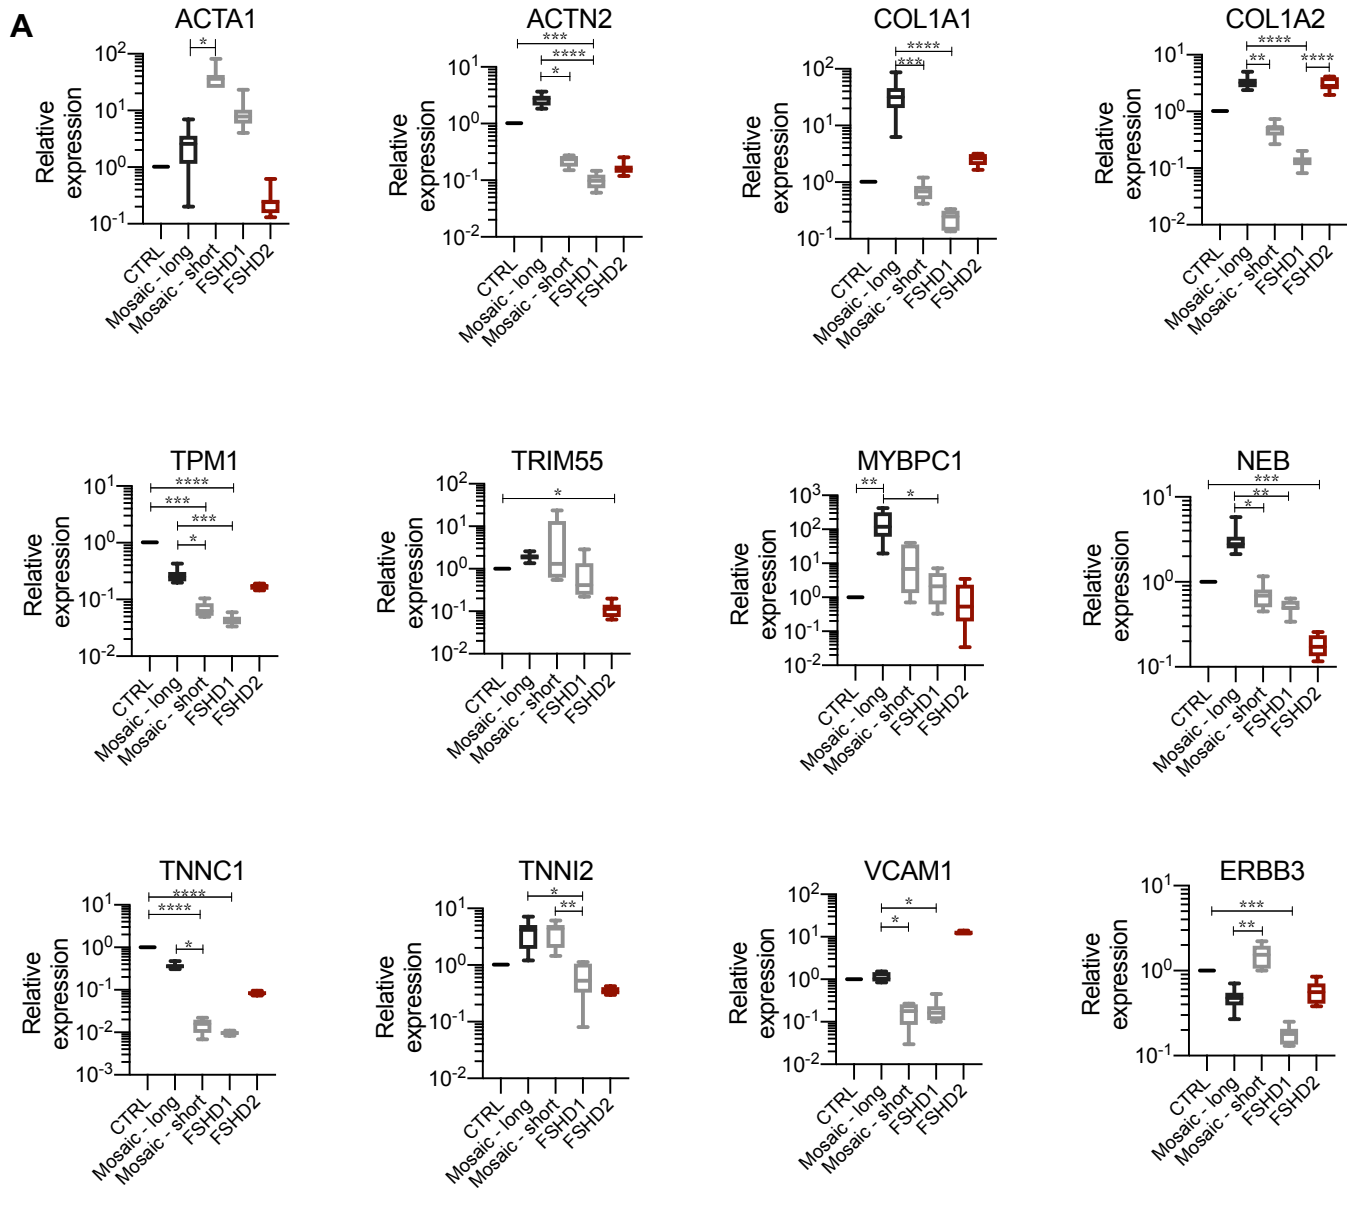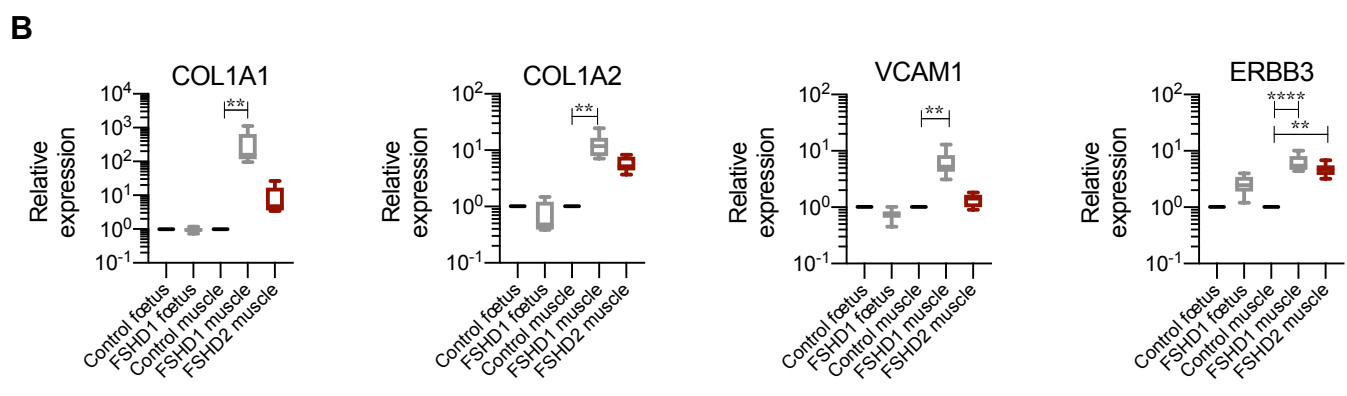

Supplement: JCSM-13-621-s002.pdf [file JCSM-13-621-s002.pdf]
